# Supplementary material
Source: Royal Society of Chemistry journal article supplement (doi:10.1039/d5ee07501g)
Supplement: d5ee07501g1.xlsx [file d5ee07501g1.xlsx]

## Sheet: Fig. 1
	Fig. 1c
	Year	Stability (h)	Current density (mA cm-2)	Reference
	2016	678	2000	Journal of Power Sources 2016, 328, 452-462.
	2016	682	1500
	2017	1000	200	Energy Technol. 2017, 5, 929-936.
	2017	4380	50
	2017	550	140	Journal of CO2 Utilization 2017, 20, 208-217.
	2018	760	120	Fronties in Chemistry 2018, 6, 264.
	2018	800	150	Journal of CO₂ Utilization 2018, 24, 454–462.
	2018	600	150
	2018	3800	200	Journal of The Electrochemical Society 2018, 165, J3371-J3377.
	2018	1200	300	Nature Catalysis 2018, 1, 32–39.
	2020	1000	200	Journal of CO2 Utilization 2020, 42, 101349.
	2020	1910	300	Applied Energy 2020, 259, 114130.
	2021	700	394.3	Nature Communications 2021, 12, 5067.
	2021	2400	100	Nature Communications 2021, 12, 5223.
	2021	567	450	Nature Communications 2021, 12, 5665.
	2021	1000	500
	2022	750	100	Nature Catalysis 2022, 5, 288–299.
	2023	820	100	Nature 2023, 617, 724–729.
	2024	5200	600	Nature 2024, 626, 86-91.
	2024	1000	333.3	Nature Energy 2024, 9, 81-91.
	2024	500	620	J. Am. Chem. Soc. 2024, 146, 20530-20538.
	2024	760	200	J. Am. Chem. Soc. 2024, 146, 27060-27069.
	2024	528	100	Nature Communications 2024, 15, 5998.
	2025	2000	1000	Nature 2025, 641, 1156–1161.
	2025	720	23	Nano Lett. 2025, 25, 6548-6555.
	2025	3000	200	Adv. Mater. 2025, 2509720.
	2025	1000	100	Nature Energy 2025, 10, 266–277.
	2025	500	200
	2025	4500	100	Science 2025, 388, doi: 10.1126/science.adr3834.
	2025	2000	100
	2025	1300	100
	2025	500	100	J. Am. Chem. Soc. 2025, 147, 34019–34026.
	2025	1500	600	Nature Calalysis 2025, 8, 968-976.
	2025	500	240	Nature Communications 2025, 16, 6082.
	2025	500	200	Nature Energy 2025, doi: 10.1038/s41560-025-01883-w.
	2025	4000	100	Sci. Adv. 2025, 11, eadw7326.
	2025	1200	40	Adv. Funct. Mater. 2025, e23592.
	2026	500	1000	Nature Communications 2026, 17, 1181.
	2026	1000	1200	Nature Communications 2026, 17, 984.
	2026	500	400	Angew. Chem. Int. Ed. 2026, 65, e24258.
	2026	500	200	Angew. Chem. Int. Ed. 2026, 65, e17618.
	2026	1230	600	Nature Communications 2026, doi: 10.1038/s41467-026-69260-z.
	2026	1000	400 (CO), 500 (C2H4)	Nature Communications 2026, doi: 10.1038/s41467-026-69175-9.

## Sheet: Fig. 2
	Fig. 2a					Fig. 2c				Fig. 2d
	Catalyst	Current density (mA cm-2)	Stability (h)	Reference		Cell Configuration	Stability (h)	Reference		Cell Configuration	Product	Scale (kW)	Stability (h)	Reference
	Ag	100	1000	Nature Energy 2025, 10, 266–277.		AEM	1000	Nature Energy 2025, 10, 266–277.		AEM	CO	0.00128	240	Nanoscale 2024, 16, 7076-7084.
		200	500				500			AEM	CO	0.003375	150	ACS Energy Lett. 2023, 8, 4, 1976-1984.
		100	4500	Science 2025, 388, doi: 10.1126/science.adr3834.			4500	Science 2025, 388(6752).		AEM	CO	0.0014	273	Energy Environ. Sci. 2023, 16, 4423-4431.
		100	1300				2000			AEM	CO	0.006	60	Nature Communications 2023, 14, 1599.
		100	2000				1300			AEM	CO	0.0016	100	ChemSusChem 2023, 16, e202202376.
		100	750	Nature Catalysis 2022, 5, 288–299.			2000			AEM	CO	0.00144	40	Nature Synthesis 2022, 1, 658-667.
		300	1200	Nature Catalysis 2018, 1, 32–39.			2000			AEM	CO	0.00266	15	Chem. Sci. 2022, 13, 11918-11925.
		150	800	Journal of CO₂ Utilization 2018, 24, 454–462.			2000			AEM	CO	0.0003888	103	Angew. Chem. Int. Ed. 2022, 61, e202208534.
		150	600				760	J. Am. Chem. Soc. 2024, 146, 27060-27069.		AEM	CO	0.000624	40	Adv. Mater. 2022, 34, 2103963.
		200	3800	Journal of The Electrochemical Society 2018, 165, J3371-J3377.			528	Nature Communications 2024, 15, 5998.		AEM	CO	0.00155	200	ACS Appl. Mater. Interfaces 2022, 31, 35504-35512.
		120	760	Fronties in Chemistry 2018, 6, 264.			700	Nature Communications 2021, 12, 5067.		AEM	CO	0.0119467	200	Nature Energy 2021, 6, 439-448.
		50	4380	Energy Technol. 2017, 5, 929-936.			3800	Journal of The Electrochemical Society 2018, 165, J3371-J3377.		AEM	CO	0.0128	150	Energy Environ. Sci. 2020,13, 4098-4105.
		200	1000				760	Fronties in Chemistry 2018, 6, 264.		AEM	CO	0.0007872	20	Joule 2019, 3, 265-278.
		100	820	Nature 2023, 617, 724–729.			4380	Energy Technol. 2017, 5, 929-936.		AEM	CO	0.02016	6
	Bi	23	720	Nano Lett. 2025, 25, 6548-6555.			1000			AEM	CO	0.00072	100	Energy Environ. Sci. 2019,12, 2455-2462.
		100	2400	Nature Communications 2021, 12, 5223.			820	Nature 2023, 617, 724–729.		AEM	CO	0.00086	100	Science 2019, 365, 367-369.
		200	1000	Journal of CO2 Utilization 2020, 42, 101349.			1500	Nature Calalysis 2025, 8, 968-976.		AEM	CO	0.000351	9	J. Mater. Chem. A 2019, 7, 10651-10661.
	Cu	333.3	1000	Nature Energy 2024, 9, 81-91.			500	Nature Communications 2025, 16, 6082.		AEM	CO	0.003	3800	Journal of The Electrochemical Society 2018, 165, J3371-J3377.
		230	500	J. Am. Chem. Soc. 2024, 146, 20530-20538.		PEM	5200	Nature 2024, 626, 86-91.		AEM	CO	0.0063	72
		620	500			CEM	564	Angew. Chem. Int. Ed. 2020, 59, 20112 – 20119.		AEM	CO	0.0099	4
		100	528	Nature Communications 2024, 15, 5998.			800	Journal of CO₂ Utilization 2018, 24, 454–462.		AEM	CO	0.00042	70	ACS Appl. Mater. Interfaces 2018, 10, 38024-38031.
		600	1500	Nature Calalysis 2025, 8, 968-976.			500	Nature Energy 2025, 10, 1360–1370.		AEM	CO	0.00075	1000	Energy Technol. 2017, 5, 929-936.
		240	500	Nature Communications 2025, 16, 6082.		BPM	1000	Nature Energy 2024, 9, 81-91.		AEM	Formate	0.00168	120	ACS Catal. 2024, 14, 8050-8061.
		200	500	Nature Energy 2025, 10, 1360–1370.		PSE	750	Nature Catalysis 2022, 5, 288–299.		AEM	Formate	0.0195	10
							1000	Journal of CO2 Utilization 2020, 42, 101349.		AEM	Formate	0.00594	70	Chemical Engineering Journal 2023, 464, 142573.
							550	Journal of CO2 Utilization 2017, 20, 208-217.		AEM	Formate	0.00612	100	Applied Surface Science 2023, 620, 156867.
										AEM	Formate	0.00195	5	Adv. Energy Mater. 2023, 13, 2300402.
										AEM	Formate	0.001728	25	Applied Catalysis B: Environmental 2022, 311, 121377.
										AEM	Formate	0.003575	30	Chem. Commun. 2022,58, 7654-7657.
										AEM	Formate	0.00027	180	Small 2024, 20, e2400441.
										AEM	C2H4	0.00195	110	Joule 2021, 5, 709-716.
										AEM	C2H4	0.00355	120	Nature Energy 2024, 9, 422-433.
										AEM	C2H4	0.00555	200	Adv. Mater. 2024, 36, 2313926.
										AEM	C2H4	0.00058	30	Adv. Funct. Mater. 2024, 34, 2310029.
										AEM	C2H4	0.00378	400	Angew. Chem. Int. Ed. 2023, 62, e202309319.
										AEM	C2H4	0.00197964	62	Applied Catalysis B: Environmental 2023, 331, 122597.
										AEM	C2H4	0.000438	190	Nature 2020, 577, 509-513.
										AEM	C2H4	0.00225	100	Joule 2019, 3, 2777-2791.
										AEM	C2H4	0.00418	100	ACS Energy Lett. 2020, 5, 2811-2818.
										AEM	C2H4	0.00555	65	Nature Catalysis 2020, 3, 98-106.
										AEM	C2H4	0.00429	60	Science 2020, 367, 661-666.
										AEM	C2H4	0.00728	100	Nature Communications 2021, 12, 7210.
										AEM	C2H4	0.005	65	Adv. Mater. 2022, 34, 2207088.
										AEM	C2H4	0.003375	55	Nature Communications 2022, 13, 1877.
										AEM	C2H4	0.00574	55	Nature Communications 2021, 12, 2808.
										AEM	C2H4	0.003325	30	Joule 2021, 5, 429-440.
										AEM	C2H4	0.00027	10	Adv. Sci. 2024, 11, e2309963.
										AEM	Ethanol	0.003	6	ACS Catal. 2024, 14, 8776-8785.
										AEM	Ethanol	0.00836	300	J. Am. Chem. Soc. 2024, 146, 14260-14266.
										AEM	Ethanol	0.000801	22	Angew. Chem. Int. Ed. 2023, 62, e202313646.
										AEM	Ethanol	0.004	8	Chem. Sci. 2023, 14, 7966-7972.
										AEM	Ethanol	0.01504	12	Nature Communications 2022, 13, 3754.
										AEM	Ethanol	0.003325	30	Joule 2021, 5, 429-440.
										AEM	Ethanol	0.0023125	12	Nature Catalysis 2020, 3, 75-82.
										AEM	Ethanol	0.00468	47	Adv. Funct. Mater. 2024, 34, 2312719.
										AEM	Acetate	0.00025	18	Nature Synthesis 2023, 2, 448-457.
										AEM	Acetate	0.0023	120	Nature Catalysis 2022, 5, 738-745.
										CEM	CO	0.00021	10	Nature Sustainability 2024, 7, 931-937.
										CEM	CO	0.00185	50	Angew. Chem. Int. Ed. 2024, 63, e202317828.
										CEM	CO	0.00118	20	Energy Environ. Sci. 2023, 16, 1502-1510.
										CEM	CO	0.0074	8
										CEM	CO	0.00114	50	ACS Energy Lett. 2022, 7, 12, 4224-4231.
										CEM	CO	0.0016575	15	ACS Appl. Mater. Interfaces 2022, 14, 7900-7908.
										CEM	CO	0.00064	4	Nature Catalysis 2022, 5, 268-276.
										CEM	Formic acid	0.0027	5200	Nature 2024, 626, 86-91.
										CEM	Formic acid	0.0018	50	Proc. Natl. Acad. Sci. USA 2023, 120, e2312876120.
										CEM	Formic acid	0.00057	24	Small 2023, 19, 2207650.
										CEM	Formic acid	0.00316	24	Nano Research 2024, 17, 5817-5825.
										CEM	C2H4	0.0019	8	ACS Energy Lett. 2021, 6, 2952-2959.
										CEM	C2H4	0.00504	12	Science 2021, 372, 1074-1078.
										CEM	C2H4	0.0007	30	Nature Synthesis 2023, 2, 403-412.
										CEM	C2H4	0.000672	10	Nature Communications 2023, 14, 2387.
										BPM	CO	0.0014	24	ACS Energy Lett. 2018, 3, 149-154.
										BPM	CO	0.00240625	5.5	ACS Energy Lett. 2021, 6, 4291-4298.
										BPM	CO	0.00136	5	Angew. Chem. Int. Ed. 2024, 63, e202400414.
										BPM	CO	0.00124	200	Adv. Funct. Mater. 2023, 13, 2301614.
										BPM	C2H4	0.262702	1000	Nature Energy 2024, 9, 81-91.
										BPM	C2H4	0.0019	24	ACS Appl. Energy Mater. 2024, 7, 1224-1233.
										BPM	C2H4	0.00094	8	ACS Energy Lett. 2023, 8, 2979-2985.
										BPM	C2H4	0.00125	2	ACS Energy Lett. 2021, 6, 2952-2959.
										BPM	C2H4	0.00315	14	ACS Energy Lett. 2023, 8, 4674-4683.
										PSE	Formic acid	0.00245	550	Journal of CO2 Utilization 2017, 20, 208-217.
										PSE	Formic acid	0.0038	1000	Journal of CO2 Utilization 2020, 42, 101349.
										PSE	Formic acid	0.000285	100	Nature Communications 2020, 11, 3633.
										PSE	Formic acid	0.0001995	30
										PSE	Formic acid	0.000384	100	Nature Energy 2019, 4, 776-785.
										PSE	Formic acid	0.0014	130	Nature Communications 2024, 15, 1711.

## Sheet: Fig. 3
	Fig. 3b						Fig. 3c
	Reaction	Continuous or not	Current density (mA cm-2)	Stability (h)	Reference		Product	Stability (h)	Expected lifetime (a)	Current density (mA cm-2)	Company
	CO2RR	Continuous opr.	100	4500	Science 2025, 388, doi: 10.1126/science.adr3834.		CO	2000	5	500-1000	Swift New Energy
			100	2000				5000	6	1000-1500	Proton Power
			100	1300				3000	7	200-400	Carbon Energy
			1000	2000	Nature 2025, 641, 1156–1161.			1500	10	1000-2000	Siemens Energy
			23	720	Nano Lett. 2025, 25, 6548-6555.			6000	9	1500-2000	Phoenix Technology
			333.3	1000	Nature Energy 2024, 9, 81-91.			3000	9	500-1000	Twelve Bipolar Stack
			230	500	J. Am. Chem. Soc. 2024, 146, 20530-20538.		C2H4	2500	5	300-600	Opus 12 Mosaic
			620	500			Formate	1000	6	100-300	OCOchem
			100	750	Nature Catalysis 2022, 5, 288–299.			4500	8.5	400-600	Peric
			394.3	700	Nature Communications 2021, 12, 5067.			4000	6	200-400	Evonik MEMBER
			450	567	Nature Communications 2021, 12, 5665.		Formic acid	4000	5	300-500	Opus 12 Mosaic
			500	1000
			300	1910	Applied Energy 2020, 259, 114130.
			300	1200	Nature Catalysis 2018, 1, 32–39.
			150	800	Journal of CO₂ Utilization 2018, 24, 454–462.
			150	600
			200	3800	Journal of The Electrochemical Society 2018, 165, J3371-J3377.
			120	760	Fronties in Chemistry 2018, 6, 264.
			140	550	Journal of CO2 Utilization 2017, 20, 208-217.
			100	500	J. Am. Chem. Soc. 2025, 147, 37, 34019–34026.
			240	500	Nature Communications 2025, 16, 6082.
			100	820	Nature 2023, 617, 724–729.
		Discontinuous opr.	100	1000	Nature Energy 2025, 10, 266–277.
			200	500
			200	3000	Adv. Mater. 2025, 2509720.
			600	5200	Nature 2024, 626, 86-91.
			200	760	J. Am. Chem. Soc. 2024, 146, 27060−27069.
			100	528	Nature Communications 2024, 15, 5998.
			100	2400	Nature Communications 2021, 12, 5223.
			200	1000	Journal of CO2 Utilization 2020, 42, 101349.
			200	1000	Energy Technol. 2017, 5, 929-936.
			50	4380
			600	1500	Nature Calalysis 2025, 8, 968-976.
			200	500	Nature Energy 2025, 10, 1360–1370.
	H2O electrolysis	Continuous opr.	500	500	Energy Environ. Sci. 2025, 18, 728.
			3000	500	Small 2025, 21, 2502994.
			2000	5140	Science 2025, 388, 430-436.
			10000	800	Chem. Int. Ed. 2025, 64, e202413698.
			100	900	Nature Communications 2024, 15, 9462.
			400	10000	Adv. Mater. 2024, 36, 2411302.
			1000	15200	Nature Catalysis 2024, 7, 944–952.
			200	1000	Nature Materials 2023, 22, 100–108.
			1000	3000	Adv. Mater. 2025, 37, 2507525.
			20	700	ACS Catal. 2024, 14, 3712-3724.
			1000	500	ACS Catal. 2025, 15, 6486-6496.
			5000	2000	Angew. Chem. Int. Ed. 2025, 64, e202502250.
			500	1100	Carbon Energy 2025, 7, e684.
			1000	1500	Adv. Energy Mater. 2025, 15, 2500926.
			1000	9000	Adv. Sci. 2025, 12, 2416661.
			1000	1100	Adv. Energy Mater. 2025, 15, 2406074.
			1000	1000	Angew. Chem. Int. Ed. 2021, 60, 24612.
			5000	2000	Angew. Chem. Int. Ed.. 2025, 64, e202502250
			10	1000	Energy Environ. Sci. 2025, 18, 5470.
			500	705	Adv. Mater. 2025, 37, 2501586.
			1250	2800	Nature Sustainability 2024, 7, 158–167.
			100	2500	Nature Communications 2021, 12, 4606.
			1000	3000	Nat Energy 2025, 10, 880-889.
			2000	800	Adv. Mater. 2025, 37, 2416658.
			500	3000	Journal of Energy Chemistry 2025, 107, 407–415.
			1000	2800	Science 2025, 387, 48-55.
			3000	6000	Science 2025, 387, 791-796.
			2000	1000	Adv. Mater. 2025, 37, 2507560.
			500	3000	ACS Energy Lett. 2022, 7, 2576-2583.
			2000	2000	Angew. Chem. Int. Ed. 2025, 64, e202420470.
			10	1100	Nature Communications 2024, 15, 9774.
			500	1500	Energy Environ. Sci. 2024, 17, 9435.
			1000	500	Angew.Chem. Int.Ed. 2025, 64, e202504212.
			1000	1200	Adv. Funct. Mater. 2025, 35, 2500044.
			1000	1000	Nature Communications 2025, 16, 4955.
			500	1000	Nature Communications 2024, 15, 10351.
			100	1000	Adv. Funct. Mater. 2025, doi: org/10.1002/adfm.202504862.
			500	540	Nature Communications 2025, 16, 3098.
			250	3200	Nature 2022, 612, 673-678.
			1000	5000	Nature Communications 2025, 16, 4998.
			2000	2300
			1000	550	ACS Energy Lett. 2023, 8, 5018-5024.
			1000	1300	Nature Communications 2025, 16, 5541.
			2000	600

## Sheet: Fig. 4
	Fig. 4a
	Strategy	Operation type	Catalyst	Stability (h)	Faradaic efficiency (%)	Intervention duration (min)	Product	Reference
	Self-reconstruction	Self-healing	Cu	25 (during pretreatment)	80	/	CH4	Nature Communications 2025, 16, 7943.
				6	64		CH4	Nature Communications 2022, 13, 3158.
				8	65		C2+	ACS Catal. 2024, 14, 8310−8316.
			Bi	40	98.1		HCOOH	Angew. Chem. Int. Ed. 2024, 63, e202316640.
			Ag	70	94		CO	J. Am. Chem. Soc. 2023, 145, 14903−14911.
			In	200 (during pretreatment)	97		HCOOH	Angew. Chem. Int. Ed. 2025, 64, e202505587.
			Ni	500	98		CO	J. Am. Chem. Soc. 2025, 147, 37, 34019–34026.
	Electrochemical treatment	Self-healing	Cu	36	81.2	/	C2+	Angew. Chem. Int. Ed. 2022, 61, e202210375.
				10	73		C2+	Nature Communications 2022, 13, 1322.
				300	60		CH4	J. Am. Chem. Soc. 2023, 145, 2195−2206.
				145	50		C2H4
				1 (mechanism research, not stability testing)	76		C2+	Nature Energy 2020, 5, 317-325.
				5.5 (mechanism research, not stability testing)	10		CO	J. Am. Chem. Soc. 2022, 144, 15047−15058.
				500	60		CH4	Nature Energy 2025, 10, 1360–1370.
			Bi	100	91		HCOOH	J. Am. Chem. Soc. 2024, 146, 5333−5342.
			Ag	100	90		CO	Angew. Chem. Int. Ed. 2024, 63, e202410932.
			Sn	10	68		HCOOH	J. Am. Chem. Soc. 2024, 146, 21335−21347.
				10	83		HCOOH	Angew. Chem. Int. Ed. 2023, 62, e202301621.
		Intervention	Cu	18	38	0.5	C2H4	J. Am. Chem. Soc. 2024, 146, 19509−19520.
			Bi	1000	recover from 67.4 to 74.9	0.5	HCOOH	Journal of CO2 Utilization 2020, 42, 101349.
				300	recover from 75 to 90	5	formate	Journal of Energy Chemistry 2024, 99, 703–711.
				400	90	1–10	HCOOH	Angew. Chem. Int. Ed. 2024, 63, e202411575.
				30	recover from ~78 to ~93	30–60	HCOOH	Nature Communications 2022, 13, 7625.
			Co	~10	recover from ~10 to ~30	1–10	CH3OH	J. Am. Chem. Soc. 2025, 147, 12298−12307.
	Gas activation	Self-healing	Cu	48	61	/	C2H4	Nano-Micro Lett. 2025, 17, 66.
		Intervention	Cu	~3	32	15	C2H4	J. Am. Chem. Soc. 2024, 146, 19509−19520.
				36	recover from 27 to 48	60	C2H4	J. Am. Chem. Soc. 2022, 144, 13254−13265.
				200	recover from 25 to 43	90	C2H4
			Co	~10	recover from 10 to 31	20	CH3OH	J. Am. Chem. Soc. 2025, 147, 12298−12307.
